14. Hillyer KW, Johnston RR: Unsuspected dilution of anesthetic gases detected by an oxygen analyzer. *Anesth Analg* (Cleve) 57:491-492, 1978
15. Bageant RA, Hoyt JW, Epstein RM: Error in a pipeline gas concentration: An unanticipated consequence of a defective check valve. *ANESTHESIOLOGY* 54:166-169, 1981
16. Baraka A, Maullem M: Awareness during anesthesia due to a ventilator malfunction. *Anaesthesia* 34:678-679, 1979
17. Manawadu BR, Hartwig FE, Sherrill D, Swanson GD: Monitoring oxygen consumption utilizing low flow techniques, Low Flow and Closed System Anesthesia. Edited by Aldrete JA, Lowe HJ, Virtue RW. New York, Grune and Stratton, 1979, pp 147-150

(Accepted for publication January 21, 1983.)

Anesthesiology  
59:162, 1983

## Plasma-Sulfate-Conjugated Catecholamines during Anesthesia

*To the Editor:*—Recent reports in the Journal have examined the effects of anesthetics on adrenergic response during surgery.<sup>1,2</sup> Responses were evaluated by measuring variations in concentrations of plasma norepinephrine and epinephrine. However, the methods used in these studies measured only free plasma catecholamines, whereas, in humans, 70–80% of total plasma catecholamines are sulfate conjugated.<sup>3</sup> Thus, we performed a study in seven ASA class I or II patients (aged 25–69 years) to delineate variations in sulfate-conjugated catecholamines during anesthesia.

In all cases, induction was achieved with thiopental, 5 mg/kg, and succinylcholine, 1 mg/kg, followed by nitrous-oxide-halothane for maintenance. Radial artery blood samples were obtained simultaneously before induction of anesthesia (T1) (20 min after intraarterial insertion of catheter), 1 min after tracheal intubation (T2), and 1 min after skin incision (T3) for measurement of total and free norepinephrine (NE) and epinephrine (E) levels, using a radio-enzymatic assay method. Sulfate-conjugated catecholamines were calculated from these data by subtraction.<sup>3</sup>

As noted in other studies, free NE increased during nociceptive stimulations (table 1); free E levels decreased. Total NE and E levels did not change. The percentage of sulfate-conjugated NE decreased significantly, while the percentage of sulfate-conjugated E increased.

Sulfate-conjugated catecholamines are usually thought to be of minor importance in the regulation of circulation in humans except in some situations.<sup>4</sup> The role they play in anesthetized patients currently is under study.

J. MARTY, M.D.  
*Département d'Anesthésie  
Hôpital Bichat*

J. COUTURE, M.D.  
*Département d'Anesthésie  
Hotel Dieu de Montréal*

J. DE CHAMPLAIN  
*Département de Physiologie  
Université de Montréal  
Paris, France*

TABLE 1.

|                                   | T1         | T2          | T3          |
|-----------------------------------|------------|-------------|-------------|
| Total NE pg/ml                    | 982 ± 174  | 1,031 ± 180 | 1,033 ± 190 |
| Free NE pg/ml                     | 185 ± 32   | 275 ± 48†   | 305* ± 74   |
| Sulfate-conjugated NE in per cent | 79.9 ± 3   | 71.2* ± 3.7 | 69.3* ± 2.3 |
| Total E pg/ml                     | 517 ± 188  | 441 ± 168   | 366 ± 171   |
| Free E pg/ml                      | 64 ± 15    | 29† ± 4     | 32† ± 6     |
| Sulfate-conjugated E in per cent  | 82.4 ± 4.1 | 89.5† ± 2.1 | 89.6† ± 2.3 |

Values are mean ± SE.

\*  $P < 0.01$  versus T1 (analysis of variance).

†  $P < 0.05$ .

- ### REFERENCES
1. Roizen MF, Horrigan RW, Frazer BM: Anesthetic doses blocking adrenergic (stress) and cardiovascular responses to incision MAC-BAR. *ANESTHESIOLOGY* 54:390-398, 1981
  2. Pflug AE, Halter JB: Effects of spinal anesthesia on adrenergic tone and neuro-endocrine responses to surgical stress in man. *ANESTHESIOLOGY* 55:120-126, 1981
  3. Johnson GA, Baker CA, Smith RT: Radioenzymatic assay of sulfate conjugates of catecholamines and dopa in plasma. *Life Sci* 26:1591-1598, 1980
  4. Kuchel D, Burr NT, Hamet P, Larochelle P, Bourque M, Genest J: Essential hypertension with low conjugated catecholamines imitates pheochromocytoma. *Hypertension* 3:347-355, 1981

(Accepted for publication January 21, 1983.)
